# Supplementary material for: Four-membered C^N chelation in main-group organometallic chemistry
Source: Royal Society of Chemistry journal article supplement (doi:10.1039/d2dt03494h), 2022-12-16
Supplement: d2dt03494h1.pdf [file d2dt03494h1.pdf]

## Queries for the attention of the authors

| Query Reference | Query                                                                                                                                                                                                                                                                                                                              | Remarks                                                                                                                                                                  |
|-----------------|------------------------------------------------------------------------------------------------------------------------------------------------------------------------------------------------------------------------------------------------------------------------------------------------------------------------------------|--------------------------------------------------------------------------------------------------------------------------------------------------------------------------|
| Q1              | Have all of the author names been spelled and formatted correctly? Names will be indexed and cited as shown on the proof, so these must be correct. No late corrections can be made.                                                                                                                                               | Yes, the author names spelled in the proof is correct.                                                                                                                   |
| Q2              | Do you wish to indicate the corresponding author(s)? If so, please specify the relevant author(s).                                                                                                                                                                                                                                 | Vadapalli Chandrasekhar                                                                                                                                                  |
| Q3              | Please note that a conflicts of interest statement is required for all manuscripts. Please read our policy on conflicts of interest ( <a href="https://rsc.li/conflicts">rsc.li/conflicts</a> ) and provide a statement with your proof corrections. If no conflicts exist, please state that "There are no conflicts to declare". | The authors declare no conflict of interest.                                                                                                                             |
| Q4              | Ref. 1a: Please provide the title/journal title.                                                                                                                                                                                                                                                                                   | 1. (a) A. K. Prokof'ev and U. Khimii, <i>Russ. Chem. Rev.</i> , 1976, <b>45</b> , 6, 1028-1076; (b) A. K. Prokof'ev, <i>Russ. Chem. Rev.</i> , 1976, <b>45</b> , 519-543 |
| Q5              | Ref. 20: Please provide the initial(s) for the 1st author.                                                                                                                                                                                                                                                                         | Z. Wang and Y. Li, <i>Organometallics</i> , 2003, <b>22</b> , 4900-4904                                                                                                  |
| Q6              | Ref. 60: Please provide the title/journal title.                                                                                                                                                                                                                                                                                   | C. Drost, P. B. Hitchcock, M. F. Lappert and L. J.-M. Pierssens, <i>Chem. Commun.</i> , 1997, 1141-1142                                                                  |

## Acknowledgements

R. K. acknowledges Tata Institute of Fundamental Research- Hyderabad, Government of India for an Institute Post-doctoral Fellowship. V. C. thanks the Department of Science and Technology (DST), India for J. C. Bose fellowship.

## Funding information

| Funder name                          | Funder's main country of origin | Funder ID (for RSC use only) | Award/grant number                 |
|--------------------------------------|---------------------------------|------------------------------|------------------------------------|
| TIFR-Hyderabad                       | India                           |                              | Institute post-doctoral fellowship |
| Department of Science and Technology | India                           |                              | J. C. Bose fellowship              |

## Researcher information

| First (given) and middle name(s) | Last (family) name(s) | ResearcherID | ORCID iD            |
|----------------------------------|-----------------------|--------------|---------------------|
| Ramkumar                         | Kannan                |              | 0000-0003-2025-7754 |
| Vadapalli                        | Chandrasekhar         |              | 0000-0003-1968-2980 |

## Corrections

| Sl. No | Present                                                                                                                                                                                                                                           | Corrected                                                                                                                                                                                                         |
|--------|---------------------------------------------------------------------------------------------------------------------------------------------------------------------------------------------------------------------------------------------------|-------------------------------------------------------------------------------------------------------------------------------------------------------------------------------------------------------------------|
| 1.     | <p><b>Page No. 5, Scheme 2 (line 50-55)</b><br/> The ligand numbers should not be in superscript.<br/> E.g., L<sub>1</sub>-L<sub>14</sub></p> 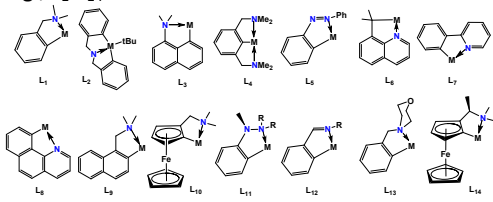                   | <p>It supposed to be <b>L1-L14</b>.</p>                                                                                         |
| 1.     | <p><b>Page No. 14 (Line 45)</b><br/> Interestingly, it has been observed that the Sb–O bond distance in <b>88a</b>, containing the constrained four-membered chelate ring, is shorter (Sb–O, 2.340(3) Å) than in <b>88b</b> (Sb–O, 2.465(2)).</p> | <p>Interestingly, it has been observed that the Sb–O bond distance in <b>88a</b>, containing the constrained four-membered chelate ring, is shorter (Sb–O, 2.340(3) Å) than in <b>88b</b> (Sb–O, 2.465(2) Å).</p> |
| 2.     | <p><b>Page No. 18, Scheme 61 (line 40)</b><br/> Near product yield, catalyst numbers need to be changed.</p>                                                   |                                                                                                                               |
